# Supplementary material
Source: Springer Nature journal article supplement (https://www.springermedizin.de/resource/supplementary/12891_2012_1696_MOESM2_ESM.pdf/9508380)

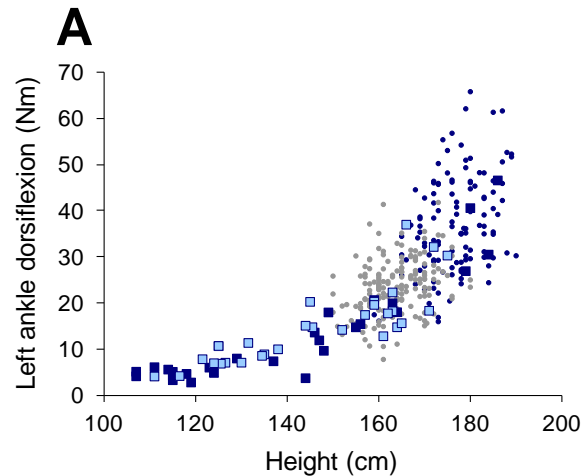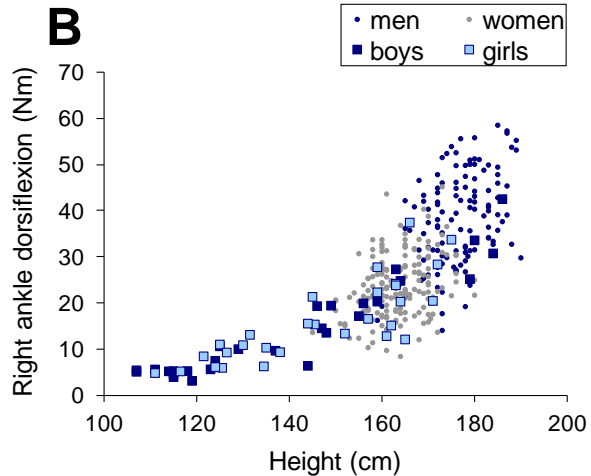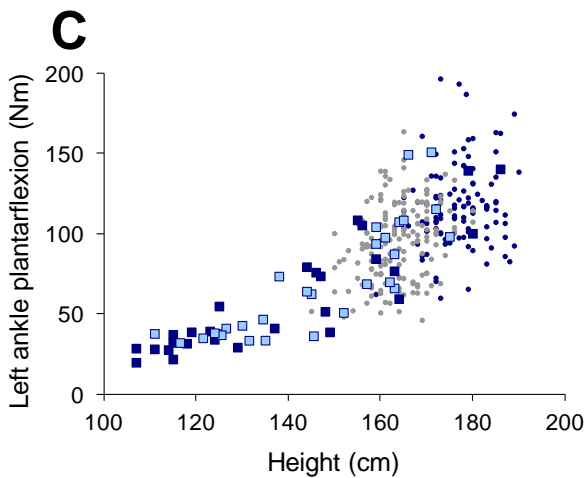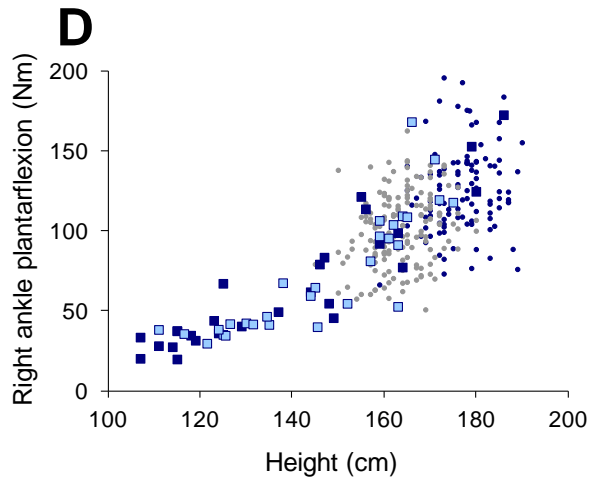

Supplement: MOESM2 [file 9508380]
